# Supplementary material
Source: PubMed Central journal article supplement (PMC6004607)
Supplement: NIHMS973807-supplement-Supplement.pdf [file NIHMS973807-supplement-Supplement.pdf]

## Supporting Information:

# Rational Targeting of Cellular Cholesterol in Diffuse Large B-Cell Lymphoma (DLBCL) Enabled by Functional Lipoprotein Nanoparticles: A Therapeutic Strategy Dependent on Cell of Origin

*Jonathan S. Rink<sup>1,2</sup>, Shuo Yang<sup>3</sup>, Osman Cen<sup>3</sup>, Tim Taxter<sup>4,5</sup>, Kaylin M. McMahon<sup>1,2,5</sup>, Sol Misener<sup>1</sup>, Amir Behdad<sup>4</sup>, Richard Longnecker<sup>6</sup>, Leo I. Gordon<sup>3,7\*</sup> and C. Shad Thaxton<sup>1,2,7,8\*</sup>*

1: Department of Urology, Northwestern University, Chicago, IL, USA 60611

2: Simpson Querrey Institute for BioNanotechnology, Northwestern University, Chicago, IL, USA 60611

3: Division of Hematology/Oncology, Department of Medicine, Northwestern University, Chicago, IL, USA 60611

4: Department of Pathology, Northwestern University, Chicago, IL, USA 60611

5: Developmental Therapeutic Institute, Northwestern University, Chicago, IL, USA 60611

6: Department of Microbiology and Immunology, Northwestern University, Chicago, IL USA, 60611

7: Robert H Lurie Comprehensive Cancer Center of Northwestern University, Chicago, IL, USA  
60611

8: International Institute for Nanotechnology (IIN), Northwestern University, Evanston, IL,  
USA, 60208

KEYWORDS: Lymphoma, Cholesterol, High-density lipoproteins, Nanoparticles, B-cell  
receptor signaling

### **Corresponding Authors**

C. Shad Thaxton,

303 E. Superior St., Lurie Building 10-118

Chicago, IL 60611

[cthaxton003@md.northwestern.edu](mailto:cthaxton003@md.northwestern.edu)

Leo I Gordon

676 N St. Clair St., Galter Pavilion

Chicago, IL 60611

[l-gordon@northwestern.edu](mailto:l-gordon@northwestern.edu)

**Total Number of Supplemental Figures and Tables: 13**

**Supplemental Figure S1**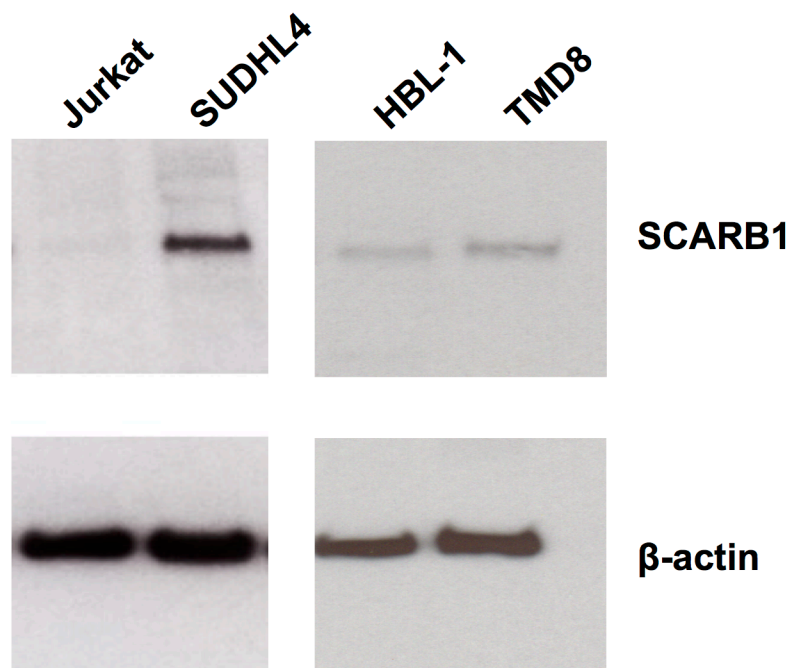

**Supplemental Figure S1: NHL cell lines express SCARB1.** Western blot of SUDHL4, TMD8, HBL-1 and Jurkat cell lines for the HDL receptor SCARB1.

## Supplemental Figure S2

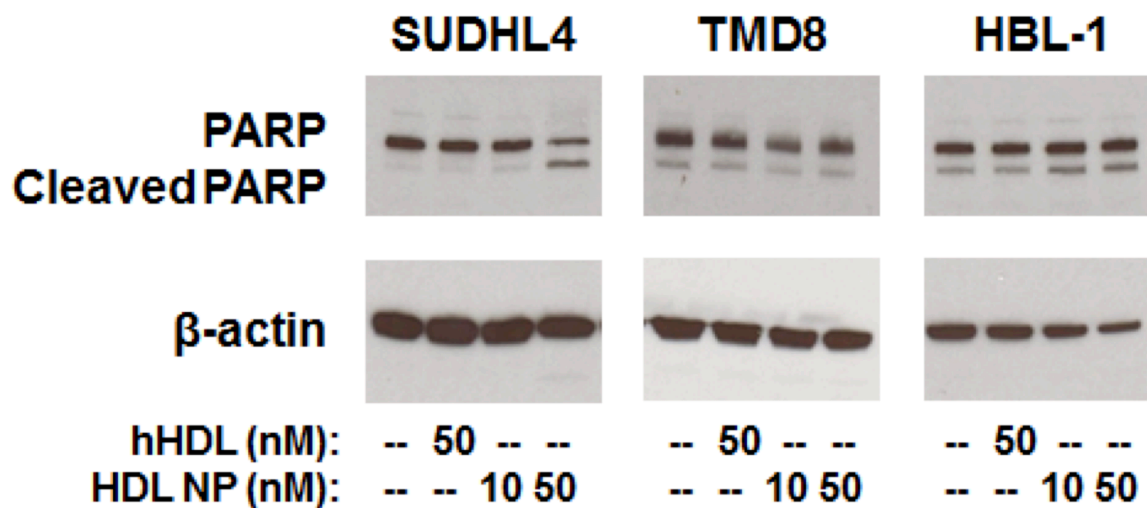

**Supplemental Figure S2: HDL NPs induce PARP cleavage in GC DLBCL but not ABC DLBCL cell lines.** HDL NPs induced PARP cleavage in the SUDHL4 cell line at 48 hrs of treatment, but not in TMD8 or HBL-1 cells.

## Supplemental Figure S3

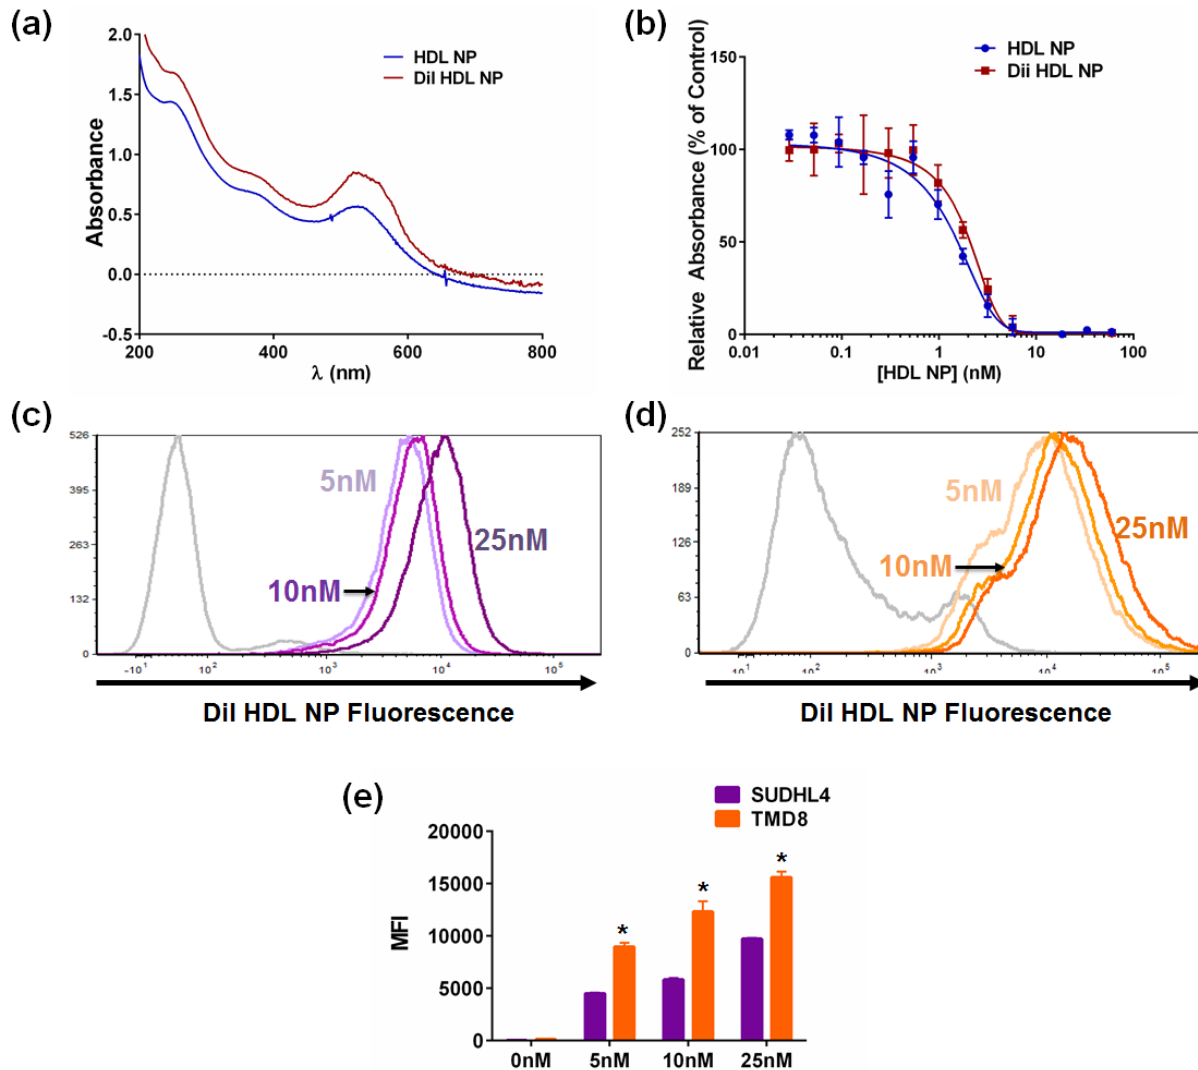

**Supplemental Figure S3: DiI HDL NP characterization and uptake in DLBCL cells.** (a) DiI HDL NPs have similar UV/Vis spectra compared to HDL NPs. (b) DiI HDL NPs induce GC DLBCL cell death similar to HDL NPs. (c-e) DiI HDL NP binding/ internalization in SUDHL4 and TMD8 cells treated with DiI HDL NPs for 24 hours. Representative histograms for SUDHL4 (c) and TMD8 (d) cells treated with increasing concentrations of DiI HDL NPs. (e) Median fluorescent intensities of DiI HDL NP-treated SUDHL4 and TMD8 cells. \* $p < 0.0001$  vs. SUDHL4.

## Supplemental Figure S4

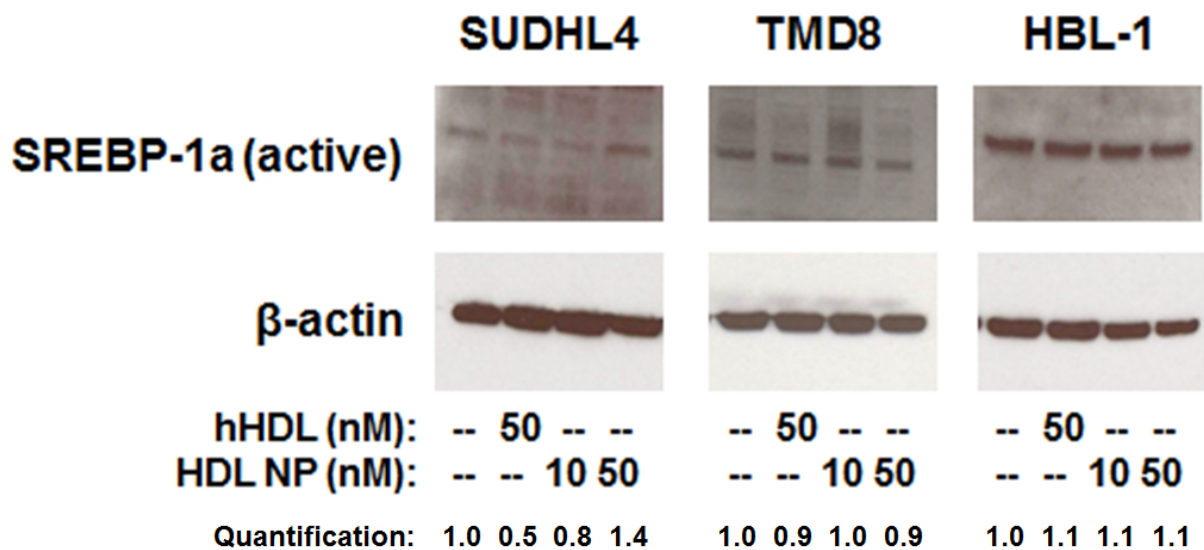

**Supplemental Figure S4: HDL NPs activate SREBP-1a in SUDHL4 but not TMD8 and HBL-1 cells.** Western blot analysis of SREBP-1a in SUDHL4, TMD8 and HBL-1 cells treated with HDL NPs (10nM, 50nM), human HDL (hHDL, 50nM) or PBS for 48 hours.  $\beta$ -actin was used as a loading control.

Supplemental Figure S5

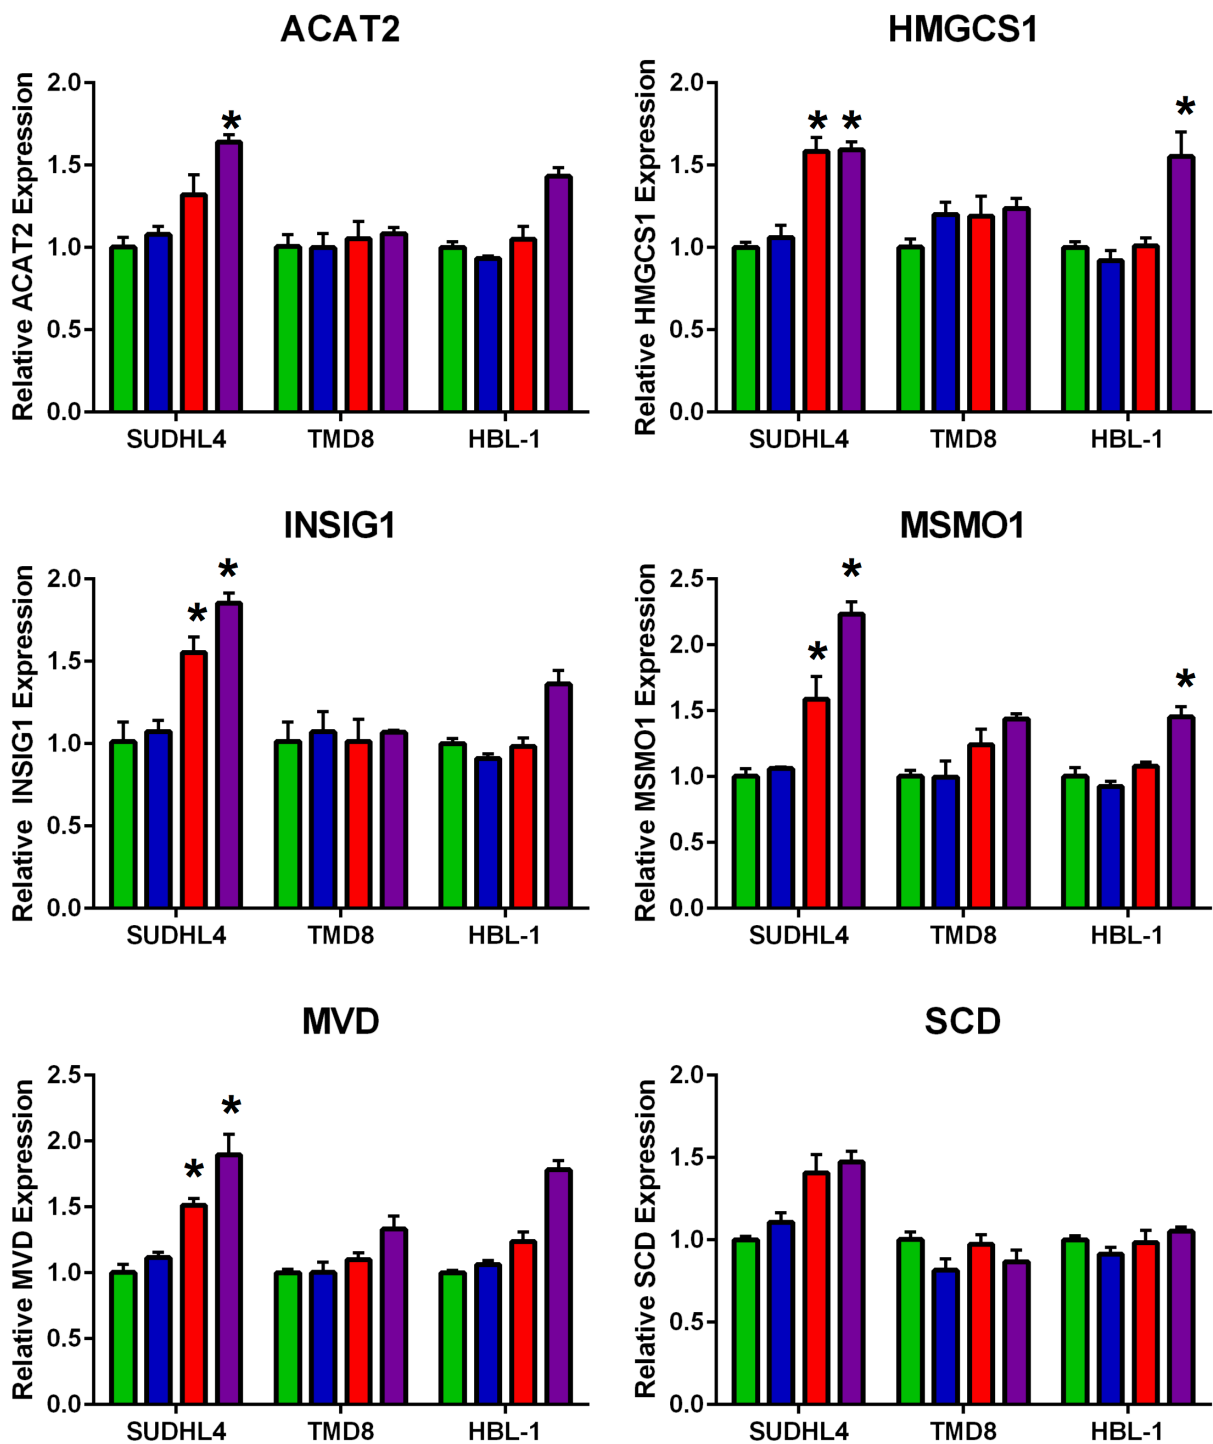

**Supplemental Figure S5: HDL NPs upregulate cholesterol biosynthesis genes.** RT-qPCR analyses of 6 prominent cholesterol synthesis genes. HDL NPs increased cholesterol biosynthesis gene expression in GC DLBCL cell lines vs. ABC DLBCL.

## Supplemental Figure S6

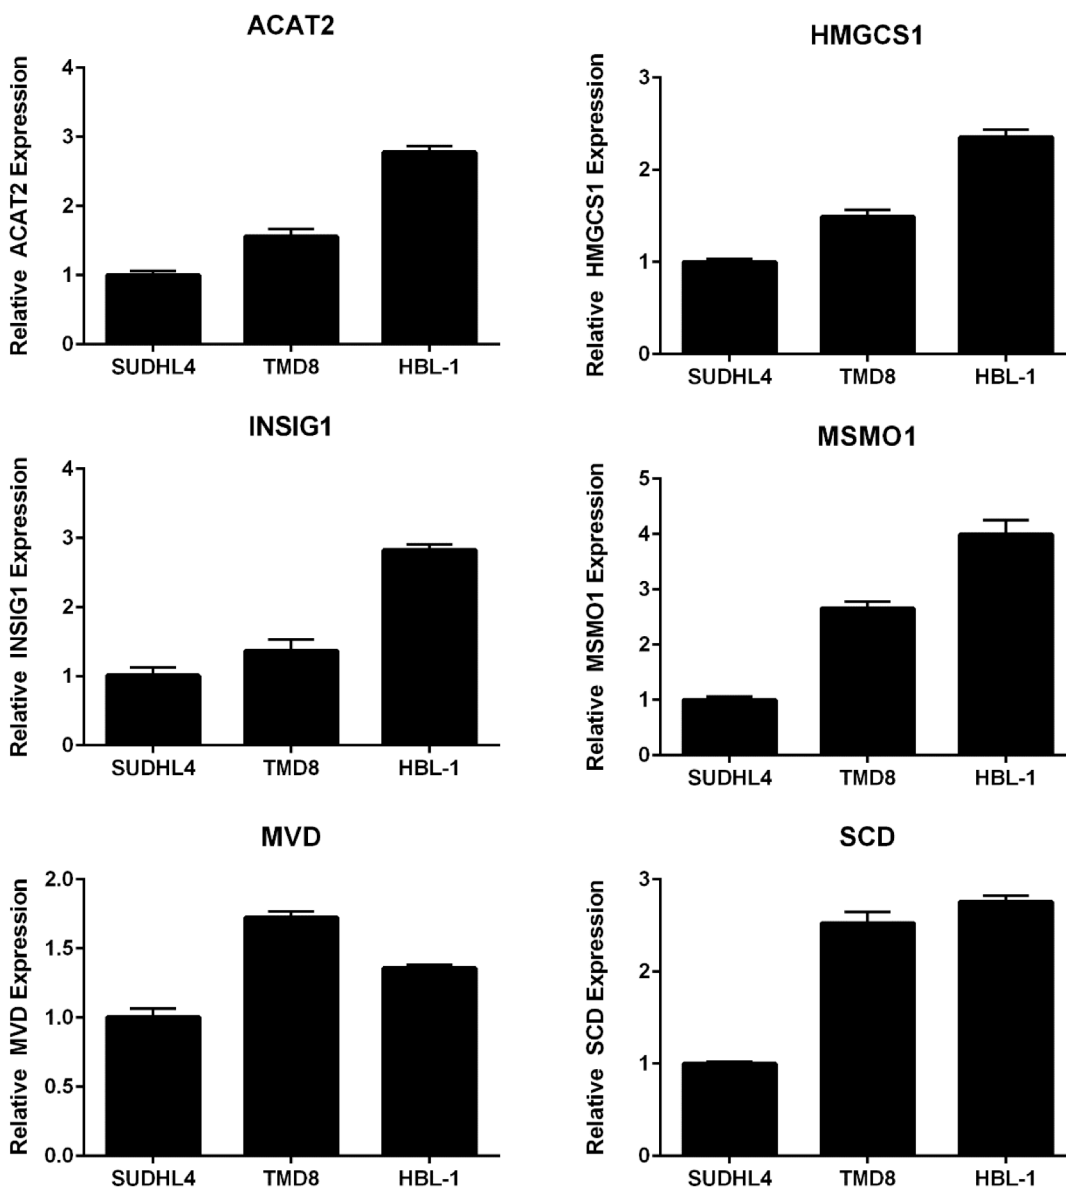

**Supplemental Figure S6: Cholesterol biosynthesis genes are expressed at a higher level in ABC compared to GC DLBCL.** RT-qPCR for cholesterol biosynthesis genes. Data were analyzed using the  $\Delta\Delta C_t$  method as relative to expression in SUDHL4.



## Supplemental Figure S7

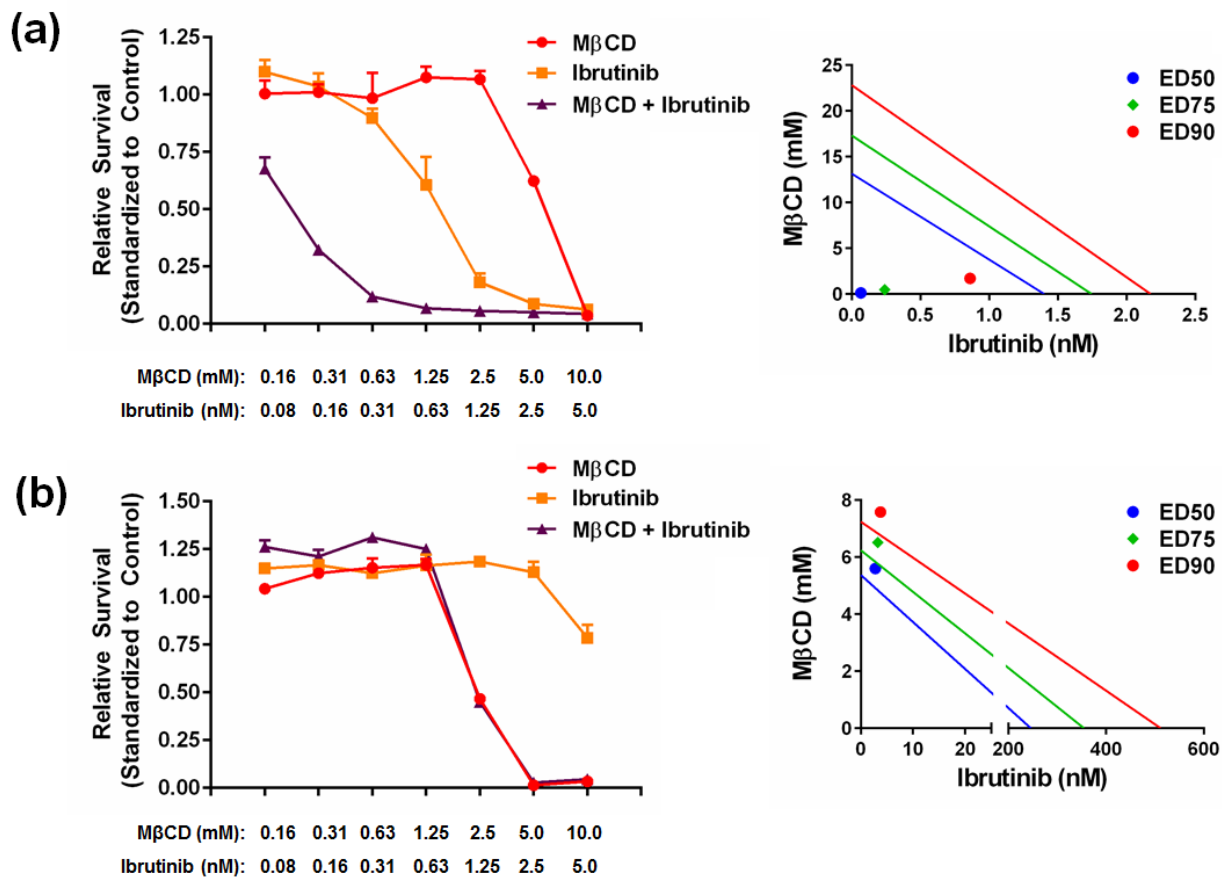

**Supplemental Figure S7: MβCD synergizes with ibrutinib in TMD8 cells but not in HBL-1 cells.** TMD8 (A) and HBL-1 (B) cells were treated with MβCD, ibrutinib or a combination and cell death assayed at 72 hours. Left- dose response curves. Right- Isobologram depicting synergy at the ED50 (blue), ED75 (green) and ED90 (red) levels.

## Supplemental Figure S8

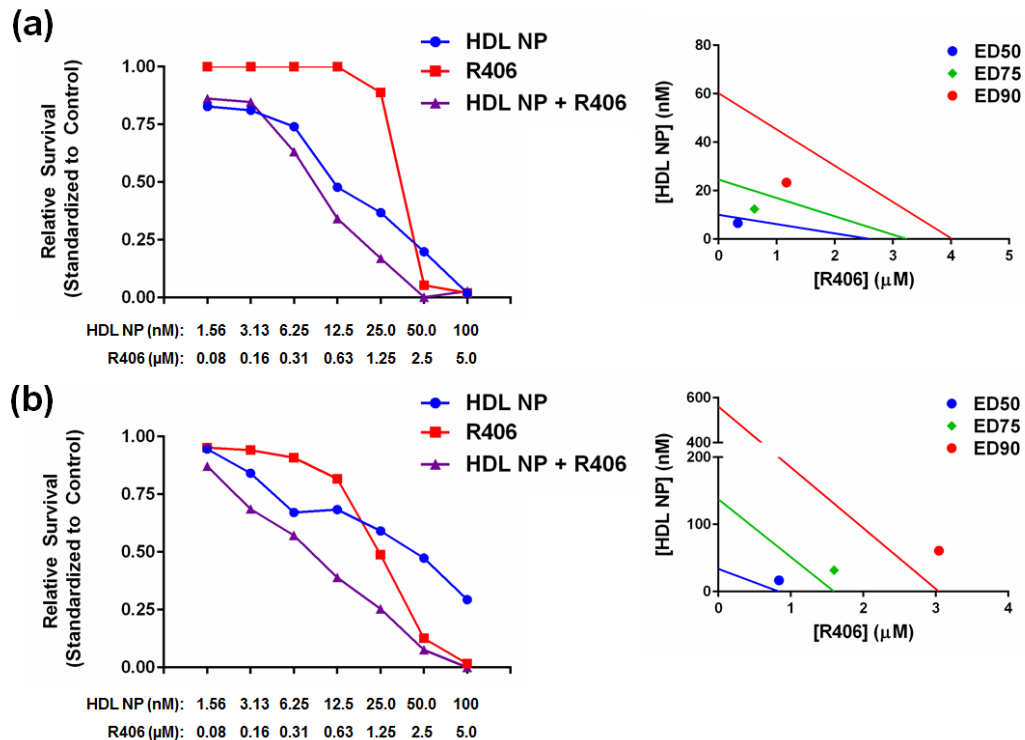

**Supplemental Figure S8: HDL NPs synergize with R406 in TMD8 cells but not in HBL-1 cells.** TMD8 (A) and HBL-1 (B) cells were treated with HDL NPs, R406 or a combination and cell death assayed at 72 hours. Left- dose response curves. Right- Isobologram depicting synergy at the ED50 (blue), ED75 (green) and ED90 (red) levels.

## Supplemental Figure S9

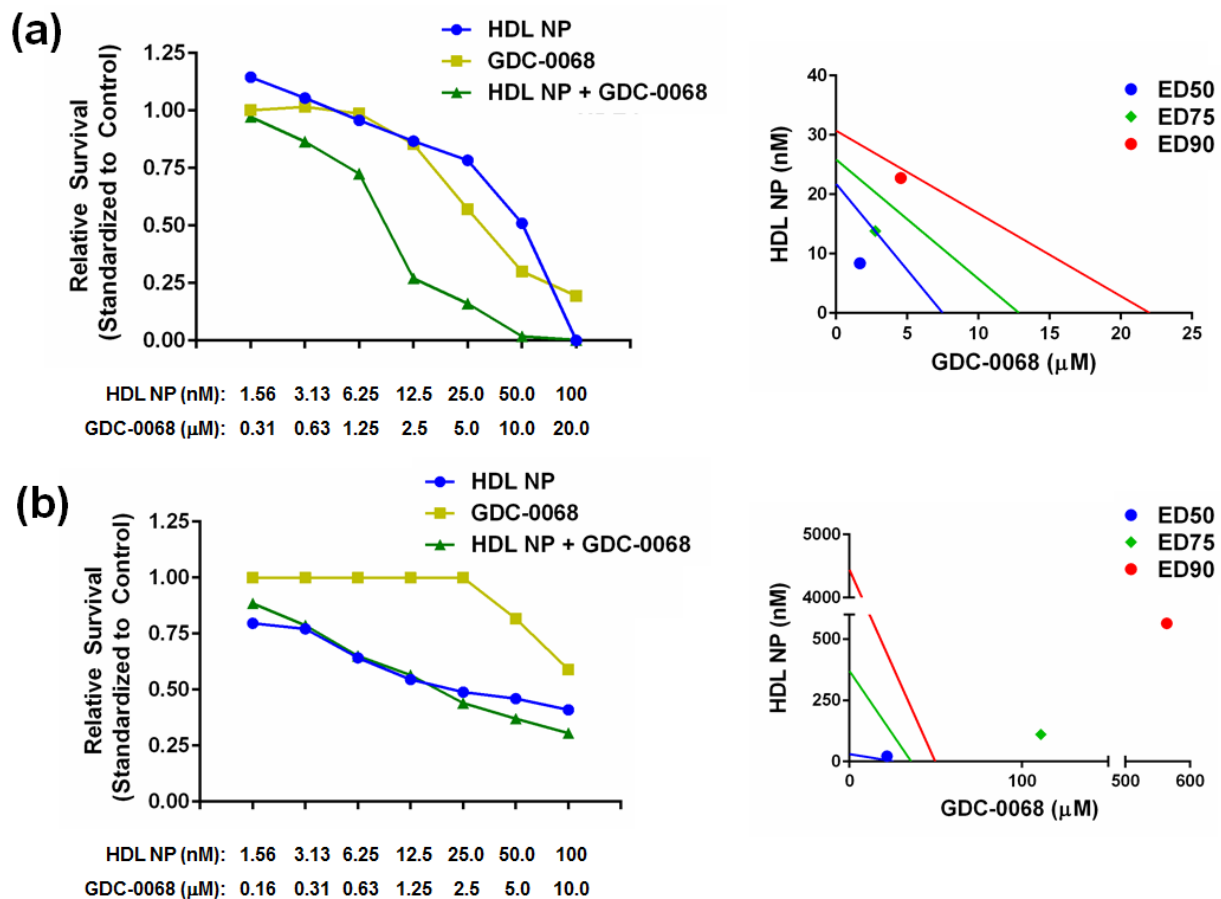

**Supplemental Figure S9: HDL NPs synergize with the AKT inhibitor GDC-0068 in TMD8 but not HBL-1 cells.** TMD8 (A) and HBL-1 (B) cells were treated with HDL NPs, GDC-0068 or a combination and cell death assayed at 72 hours. Left- dose response curves. Right- Isobologram depicting synergy at the ED50 (blue), ED75 (green) and ED90 (red) levels.

**Supplemental Figure S10**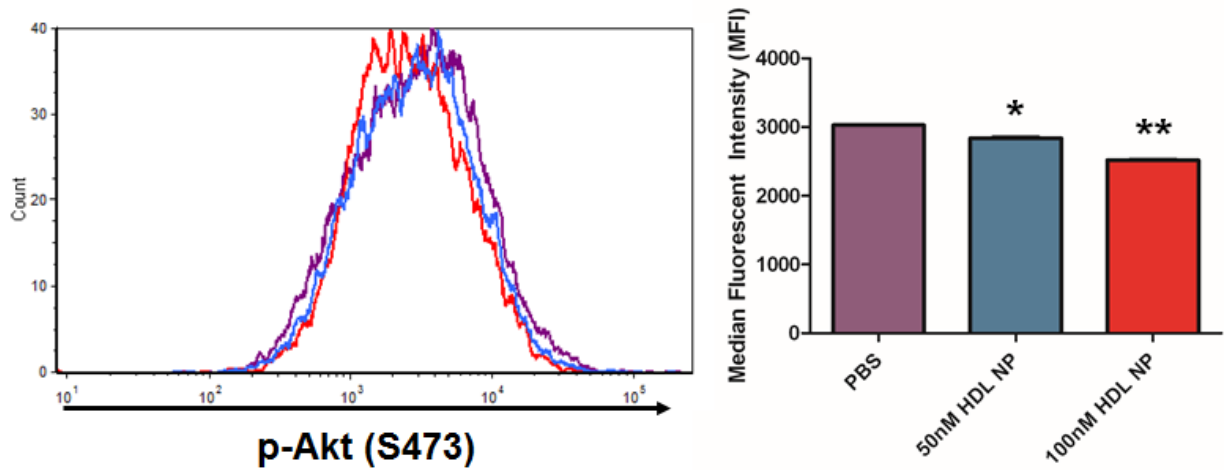

**Supplemental Figure S10: Phos-flow analysis of p-AKT in TMD8 cells.** TMD8 cells were exposed to HDL NPs for 2 hours prior to staining and flow cytometric analysis. N=3 for each condition. \* $p < 0.05$  vs. PBS control by 1-way ANOVA. \*\* $p < 0.05$  vs. PBS and 50nM HDL NP by 1-way ANOVA. All data are presented as mean  $\pm$  s.e.m.

## Supplemental Figure S11

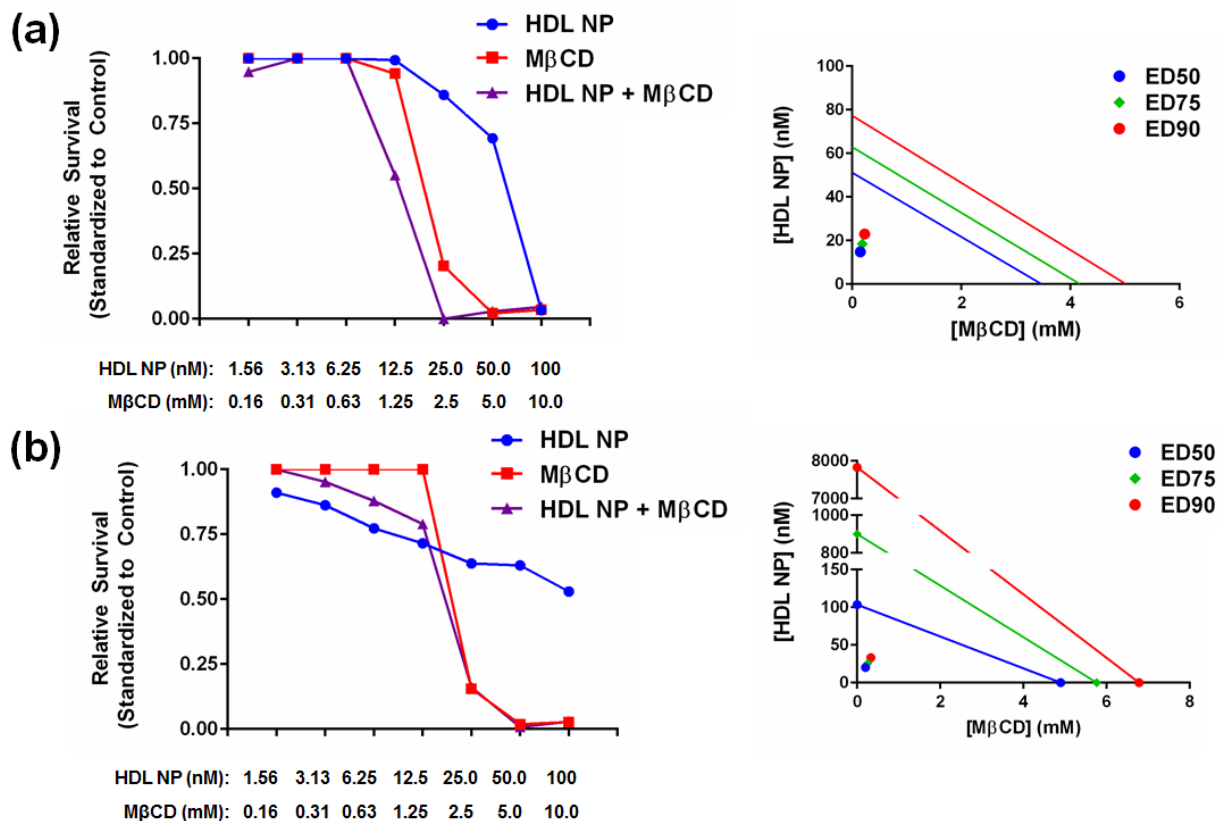

**Supplemental Figure S11: MβCD synergizes with HDL NPs against TMD8 and HBL-1 cells.** TMD8 (A) and HBL-1 (B) cells were treated with HDL NPs, MβCD or a combination and cell death assayed at 72 hours. Left- dose response curves. Right- Isobologram depicting synergy at the ED50 (blue), ED75 (green) and ED90 (red) levels.

**Supplemental Table S1: Combinatorial indices for HDL NPs and small molecule inhibitors in TMD8 and HBL-1 cell lines.**

| Cell Line    | Drug Combination                       | Combination Index (CI) at |         |          |
|--------------|----------------------------------------|---------------------------|---------|----------|
|              |                                        | ED50                      | ED75    | ED90     |
| <b>TMD8</b>  | HDL NP + GDC-0068 (1:200)              | 0.60789                   | 0.50931 | 0.43209  |
|              | HDL NP + Pilaralisib (1:100)           | 1.26515                   | 1.74498 | 2.40848  |
|              | HDL NP + Ibrutinib (20:1)              | 0.6754                    | 0.71867 | 0.76472  |
|              | HDL NP + R406 (1:50)                   | 0.78572                   | 0.69772 | 0.67877  |
|              | HDL NP + M $\beta$ CD (1:10,000)       | 0.33117                   | 0.33272 | 0.3435   |
|              | Ibrutinib + M $\beta$ CD (1:2,000,000) | 0.05802                   | 0.16535 | 0.47144  |
| <b>HBL-1</b> | HDL NP + GDC-0068 (1:1000)             | 1.55559                   | 3.39827 | 11.47275 |
|              | HDL NP + Pilaralisib (1:1000)          | 2.08512                   | 4.00031 | 8.75754  |
|              | HDL NP + Ibrutinib (20:1)              | 0.31988                   | 0.11876 | 0.06326  |
|              | HDL NP + R406 (1:50)                   | 1.49728                   | 1.23243 | 1.10864  |
|              | HDL NP + M $\beta$ CD (1:10,000)       | 0.23642                   | 0.07385 | 0.05341  |
|              | Ibrutinib + M $\beta$ CD (1:2,000,000) | 1.05307                   | 1.05331 | 1.05399  |

**Supplemental Table S2: Blood chemistry parameters of SUDHL4 tumor xenograft bearing mice following treatment.**

|                                       | Saline         | HDL NP<br>3x/ week | HDL NP<br>5x/ week |
|---------------------------------------|----------------|--------------------|--------------------|
| RBC (10 <sup>6</sup> cells/ul)        | 9.51 ± 0.09    | 9.55 ± 0.14        | 9.51 ± 0.13        |
| HGB (g/L)                             | 14.54 ± 0.12   | 14.29 ± 0.18       | 14.10 ± 0.20       |
| HCT (% blood volume)                  | 48.87 ± 0.43   | 48.59 ± 0.69       | 47.89 ± 0.70       |
| PLT (x10 <sup>3</sup> cells/ $\mu$ l) | 1039.7 ± 18.78 | 1079.3 ± 30.4      | 1121.3 ± 52.7      |
| HDL (mg/dL)                           | 49.89 ± 2.21   | 43.0 ± 0.0         | 37.44 ± 6.87       |
| LDL (mg/dL)                           | 7 ± 0          | 7 ± 0              | 6 ± 1              |
| ALT (U/L)                             | 29.25 ± 2.14   | 27.20 ± 5.84       | 25.71 ± 7.41       |
| AST (U/L)                             | 69.4 ± 6.18    | 70.7 ± 4.43        | 61.7 ± 12.9        |
| BUN (mg/dL)                           | 20.0 ± 1.32    | 17.60 ± 1.0        | 15.14 ± 3.35       |
